# Supplementary material
Source: bioRxiv or medRxiv preprint supplement (https://medrxiv.org/highwire/filestream/82864/field_highwire_adjunct_files/1/2020.05.19.20106849-2.pdf)
Supplement: Supplementary file [file 2020.05.19.20106849-2.pdf]

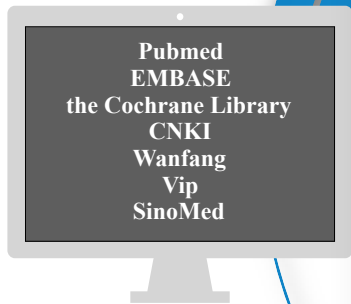

Search seven online databases

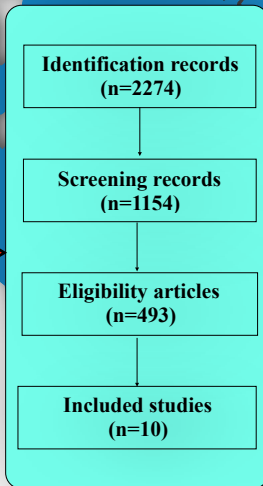

| % change in outcome<br>(95% CI) per 10 µg/<br>m <sup>3</sup> pollutant<br>increment | Pollutants               |                           |                          |
|-------------------------------------------------------------------------------------|--------------------------|---------------------------|--------------------------|
|                                                                                     | PM <sub>2.5</sub>        | PM <sub>10</sub>          | NO <sub>2</sub>          |
| TC                                                                                  | ↑ 3.31<br>(2.29, 8.91)   | /                         | /                        |
| TG                                                                                  | /                        | ↑ 5.27<br>(2.03, 8.50)    | ↑ 4.18<br>(1.12, 7.23)   |
| LDL-C                                                                               | ↑ 2.34<br>(1.30, 3.39)   | ↑ 0.45<br>(-0.57, 1.47)   | /                        |
| HDL-C                                                                               | ↓ -1.57<br>(1.85, -1.28) | ↓ -0.24<br>(-0.95, -0.47) | ↓ -0.51<br>(-2.61, 1.58) |
| MetS                                                                                | ↑ 4.33<br>(2.69, 5.98)   | /                         | /                        |
